# Supplementary material
Source: publisher figshare collection journal article supplement (https://acs.figshare.com/ndownloader/files/3987007)

**Supporting Information for:**

Thermosensitive liposomes enhance delivery of gemcitabine and oxaliplatin to tumors.

*Jonathan P. May<sup>1</sup>, Mark J. Ernsting<sup>1,2</sup>, Elijus Undzys<sup>1</sup> and Shyh-Dar Li<sup>1,3,4\*</sup>*

| <b>Contents:</b>                                                             | page |
|------------------------------------------------------------------------------|------|
| Supp. Fig1 – Drug release profiles for HaT-OXA in different biological media | S2   |
| Supp. Fig2 – HaT liposome hemolysis assay                                    | S3   |
| Supp. Fig 3 – A) Deamination of GEM; B) Substituiotn of OXA malonate         | S4   |

**Supplementary Fig. 1 – Drug release profiles for HaT-OXA in different biological media.**  
Release media containing 5% dextrose with (A) 50% serum and (B) 50% blood. Data are mean  $\pm$  S.D. (n = 3). Note error bars are very small for many of these values.

(A)

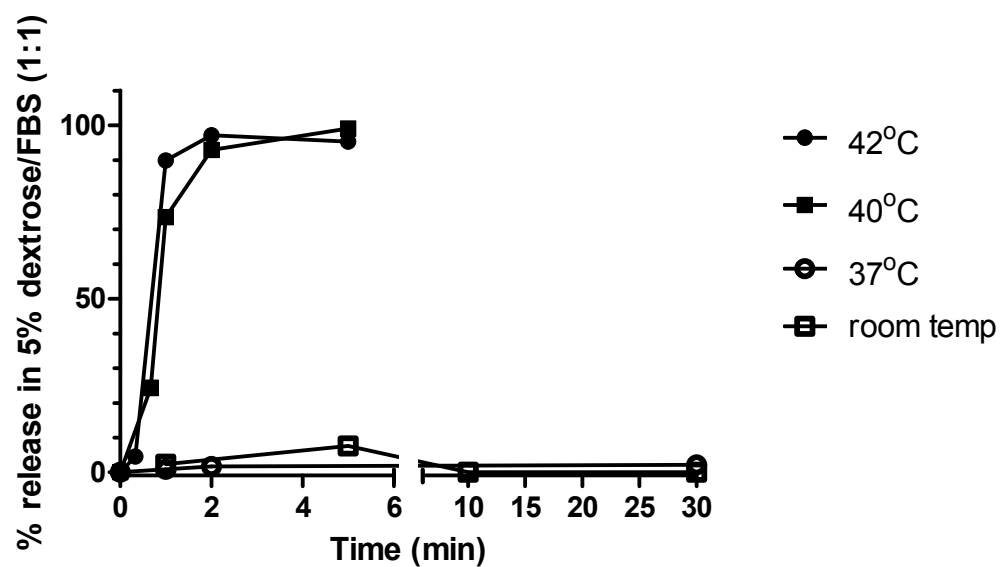

B)

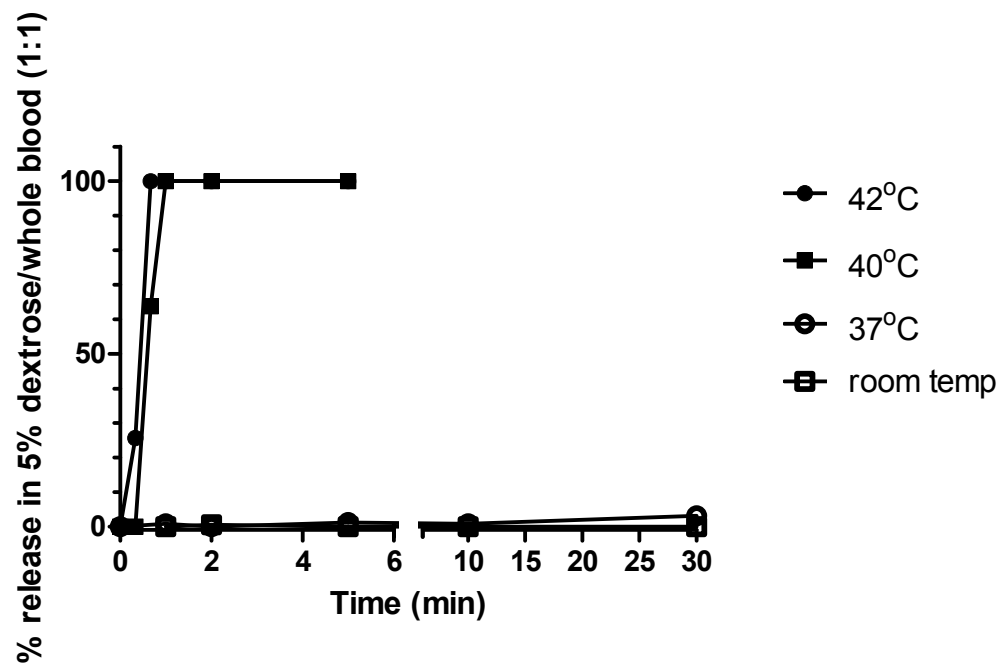

**Supplementary Fig. 2 – HaT liposome hemolysis assay.** Arrow indicates dose used for in vivo studies. All data are mean  $\pm$  S.D. (n=3). \* denotes values that are significantly higher than buffer control (p < 0.05).

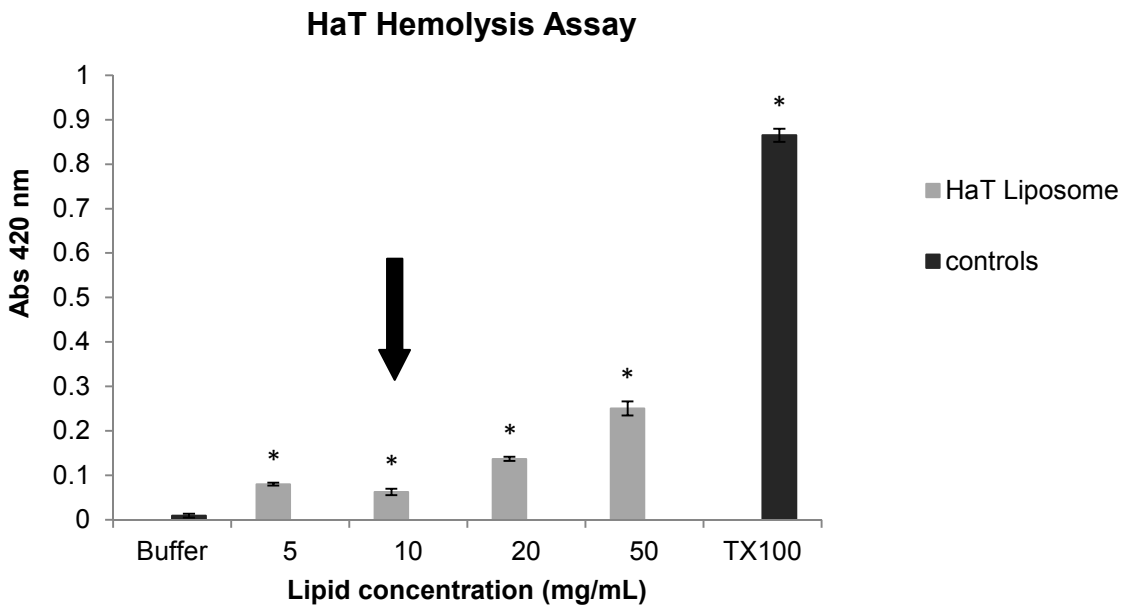

HaT-OXA dosed @ 10 mg/kg

Prep – 1 mg/mL OXA in 100 mg lipid

Typically we inject 200  $\mu$ L (for 20 g mouse) of a 1 mg OXA/mL solution  $\equiv$  20 mg lipid

Therefore [lipid] in mouse is  $\sim$  20 mg in 2 mL blood compartment  $\equiv$  10 mg/mL

HaT-GEM dosed @ 20 mg/kg

Prep – 2 mg/mL GEM in 100 mg lipid

Typically we inject 200  $\mu$ L (for 20 g mouse) of a 2 mg OXA/mL solution  $\equiv$  20 mg lipid

Therefore [lipid] in mouse is  $\sim$  20 mg in 2 mL blood compartment  $\equiv$  10 mg/mL

**Supplementary Fig. 3: (A)** Deamination of gemcitabine; **(B)** Oxaliplatin substitution of malonate moiety with chloride ions, to yield a less soluble derivative (a yellow precipitate forms in the solution).

**(A)**

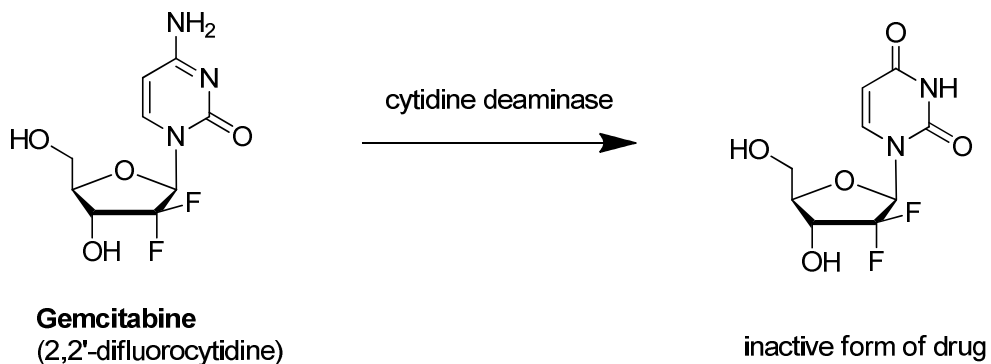

**(B)**

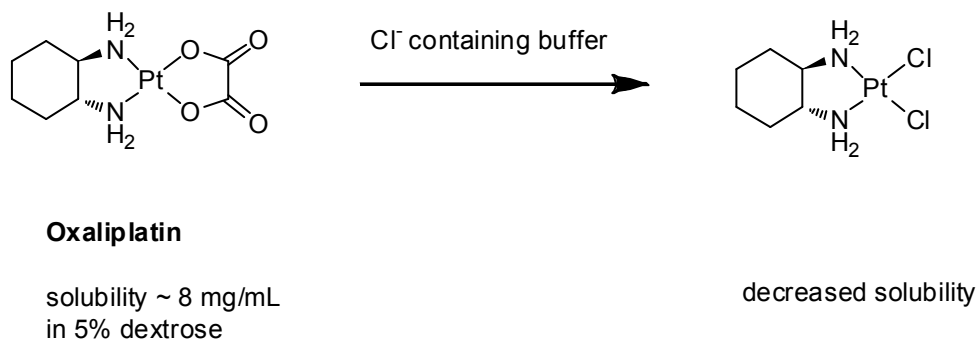

Supplement: Supplementary file 1 [file 3987007]
